# Supplementary material for: Hundreds of Circular Novel Plasmids and DNA Elements Identified in a Rat Cecum Metamobilome
Source: PubMed Central journal article supplement (PMC3913684; doi:10.1371/journal.pone.0087924), 2014-02-04

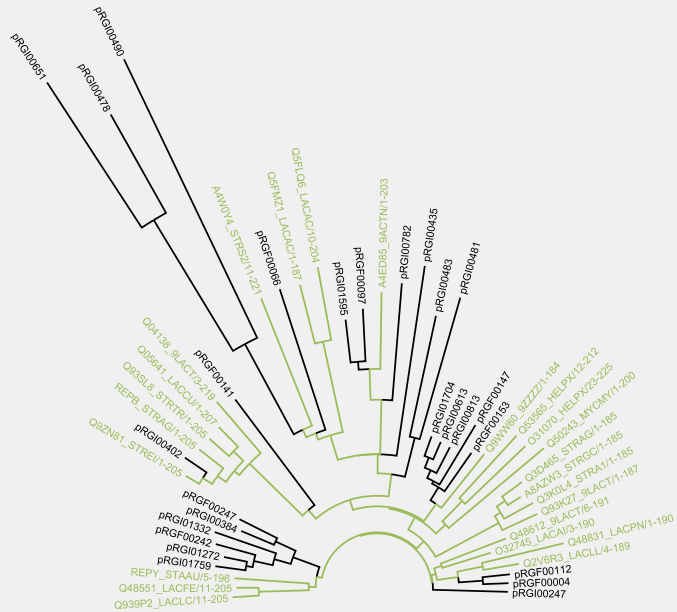



# Repl

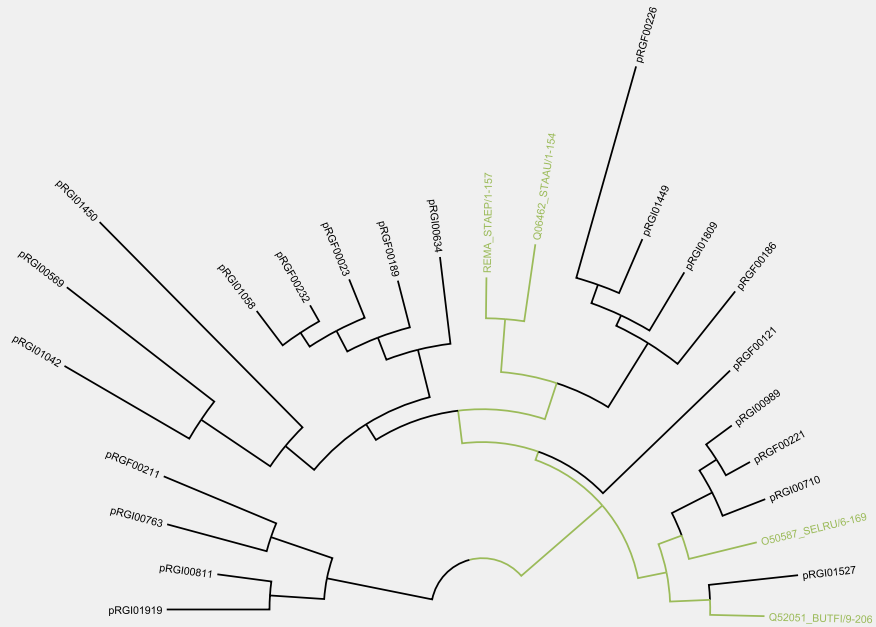



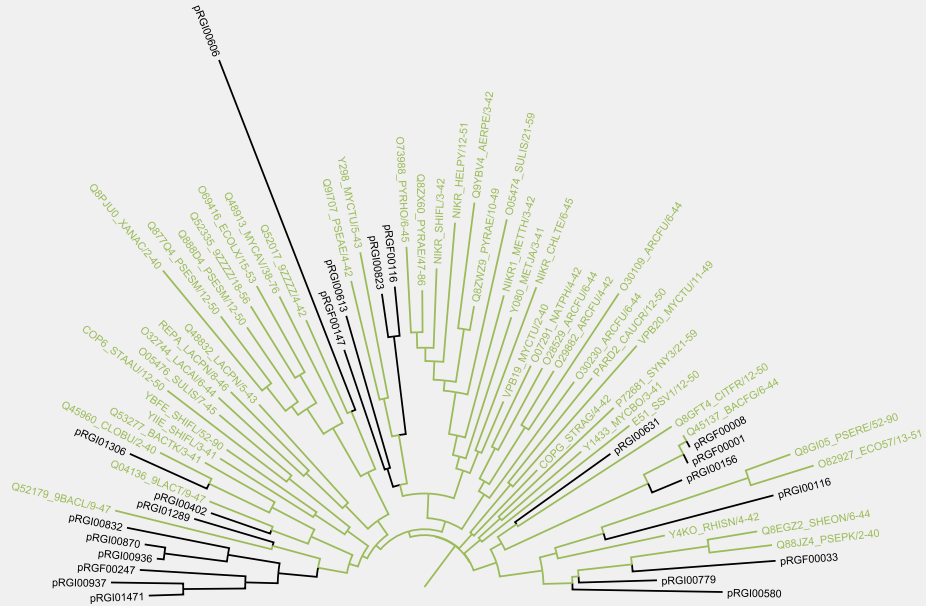

Rop

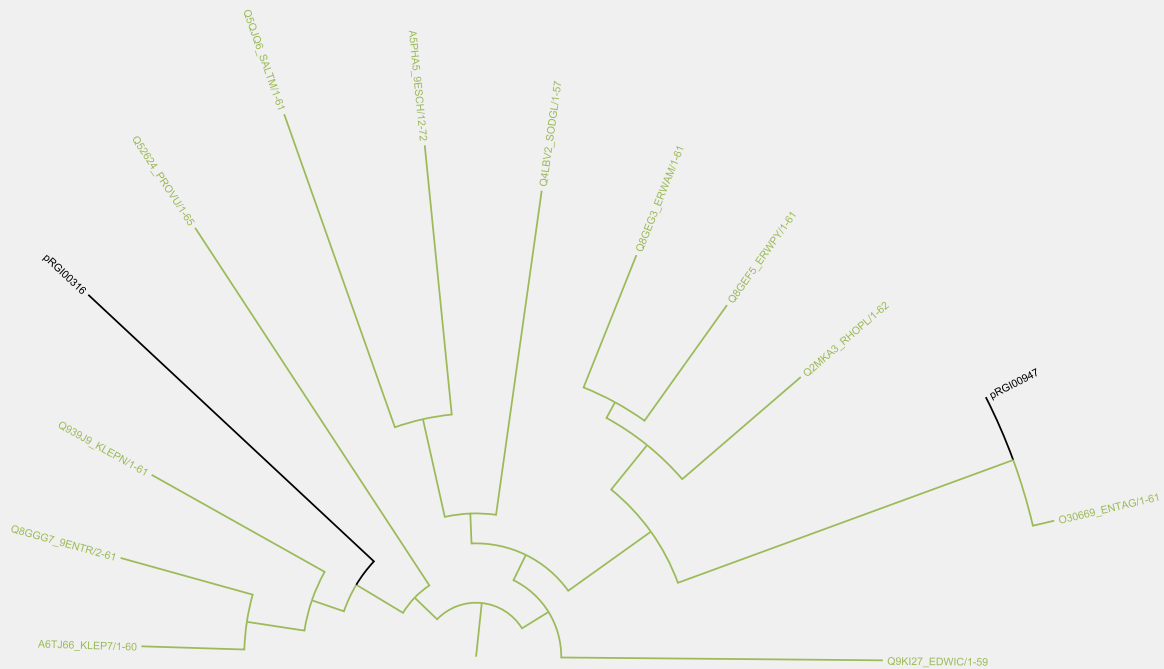

0.05

# Replicase

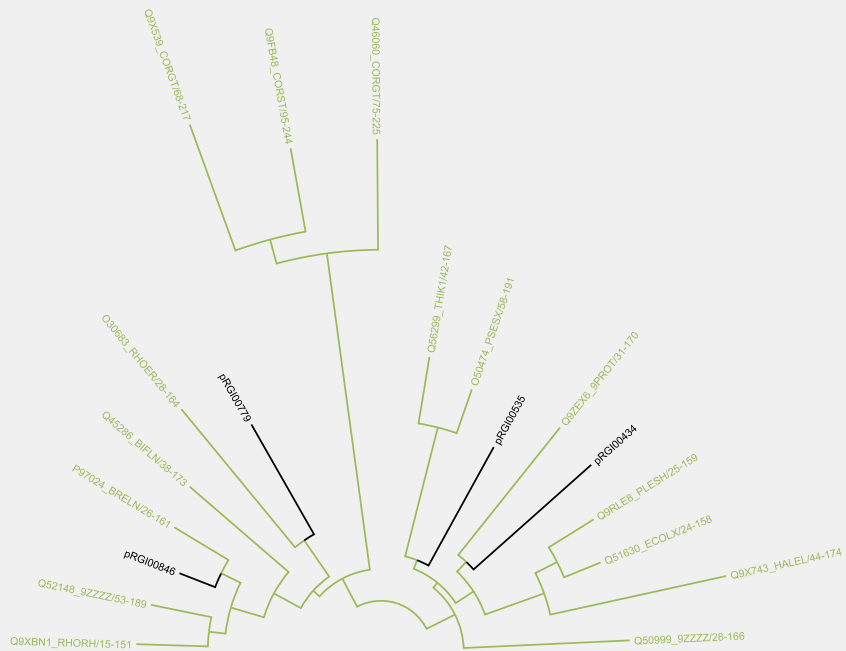

Supplement: pone.0087924.s001.pdf [file pone.0087924.s001.pdf]
